# Supplementary material for: A tool to identify recent or present rheumatoid arthritis flare from both patient and physician perspectives: The ‘FLARE’ instrument
Source: HighWire-hosted journal article supplement (doi:10.1136/ard.2011.150656), 2011-11-10
Supplement: ARD_FLARE_Q-English_150655.pdf [file ARD_FLARE_Q-English_150655.pdf]

# STPR - Strategies in the Treatment of Patients with RA

## FLARE Questionnaire: FLare Assessment in RhEumatoid arthritis

### Information prior to answer the questionnaire:

This questionnaire has been designed to be completed either by the patient him/herself or by the physician asking the questions in the course of a consultation.

**In the last three months (or at some time since the last consultation), please indicate how true the statements below are for you personally**

1 – You noticed the appearance or worsening of morning stiffness in joints over several consecutive days

|                   |   |   |   |   |   |   |   |   |   |   |    |                 |
|-------------------|---|---|---|---|---|---|---|---|---|---|----|-----------------|
| Completely untrue | 0 | 1 | 2 | 3 | 4 | 5 | 6 | 7 | 8 | 9 | 10 | Absolutely true |
|-------------------|---|---|---|---|---|---|---|---|---|---|----|-----------------|

2 – You noticed the appearance or worsening of pain in one or several joints over several consecutive days

|                   |   |   |   |   |   |   |   |   |   |   |    |                 |
|-------------------|---|---|---|---|---|---|---|---|---|---|----|-----------------|
| Completely untrue | 0 | 1 | 2 | 3 | 4 | 5 | 6 | 7 | 8 | 9 | 10 | Absolutely true |
|-------------------|---|---|---|---|---|---|---|---|---|---|----|-----------------|

3 – You noticed the appearance or worsening of swelling in one or several joints over several consecutive days

|                   |   |   |   |   |   |   |   |   |   |   |    |                 |
|-------------------|---|---|---|---|---|---|---|---|---|---|----|-----------------|
| Completely untrue | 0 | 1 | 2 | 3 | 4 | 5 | 6 | 7 | 8 | 9 | 10 | Absolutely true |
|-------------------|---|---|---|---|---|---|---|---|---|---|----|-----------------|

4 – You noticed the worsening of your sleep because of arthritic pain over several consecutive nights

|                   |   |   |   |   |   |   |   |   |   |   |    |                 |
|-------------------|---|---|---|---|---|---|---|---|---|---|----|-----------------|
| Completely untrue | 0 | 1 | 2 | 3 | 4 | 5 | 6 | 7 | 8 | 9 | 10 | Absolutely true |
|-------------------|---|---|---|---|---|---|---|---|---|---|----|-----------------|

5 – You noticed a marked worsening in your arthritis lasting several consecutive days

|                   |   |   |   |   |   |   |   |   |   |   |    |                 |
|-------------------|---|---|---|---|---|---|---|---|---|---|----|-----------------|
| Completely untrue | 0 | 1 | 2 | 3 | 4 | 5 | 6 | 7 | 8 | 9 | 10 | Absolutely true |
|-------------------|---|---|---|---|---|---|---|---|---|---|----|-----------------|

6 – You increased your doses of pain killers or anti-inflammatory medication over several consecutive days (If you are not taking any pain killer, select 'Completely untrue')

|                   |   |   |   |   |   |   |   |   |   |   |    |                 |
|-------------------|---|---|---|---|---|---|---|---|---|---|----|-----------------|
| Completely untrue | 0 | 1 | 2 | 3 | 4 | 5 | 6 | 7 | 8 | 9 | 10 | Absolutely true |
|-------------------|---|---|---|---|---|---|---|---|---|---|----|-----------------|

7 – You increased your daily dose of prednisone for several consecutive days (If you are not taking prednisone, select 'Completely untrue')

|                   |   |   |   |   |   |   |   |   |   |   |    |                 |
|-------------------|---|---|---|---|---|---|---|---|---|---|----|-----------------|
| Completely untrue | 0 | 1 | 2 | 3 | 4 | 5 | 6 | 7 | 8 | 9 | 10 | Absolutely true |
|-------------------|---|---|---|---|---|---|---|---|---|---|----|-----------------|

8 – You felt particularly tired for several consecutive days because of your rheumatic disorder

|                   |   |   |   |   |   |   |   |   |   |   |    |                 |
|-------------------|---|---|---|---|---|---|---|---|---|---|----|-----------------|
| Completely untrue | 0 | 1 | 2 | 3 | 4 | 5 | 6 | 7 | 8 | 9 | 10 | Absolutely true |
|-------------------|---|---|---|---|---|---|---|---|---|---|----|-----------------|

# STPR - Strategies in the Treatment of Patients with RA

---

9 – You were so restricted that you have decreased your daily activity over several consecutive days because of your rheumatic disorder

|                   |   |   |   |   |   |   |   |   |   |   |    |                 |
|-------------------|---|---|---|---|---|---|---|---|---|---|----|-----------------|
| Completely untrue | 0 | 1 | 2 | 3 | 4 | 5 | 6 | 7 | 8 | 9 | 10 | Absolutely true |
|-------------------|---|---|---|---|---|---|---|---|---|---|----|-----------------|

10 – You felt more irritable than usual over several consecutive days because of your rheumatic disorder

|                   |   |   |   |   |   |   |   |   |   |   |    |                 |
|-------------------|---|---|---|---|---|---|---|---|---|---|----|-----------------|
| Completely untrue | 0 | 1 | 2 | 3 | 4 | 5 | 6 | 7 | 8 | 9 | 10 | Absolutely true |
|-------------------|---|---|---|---|---|---|---|---|---|---|----|-----------------|

11 – You felt depressed over several consecutive days because of your rheumatic disorder

|                   |   |   |   |   |   |   |   |   |   |   |    |                 |
|-------------------|---|---|---|---|---|---|---|---|---|---|----|-----------------|
| Completely untrue | 0 | 1 | 2 | 3 | 4 | 5 | 6 | 7 | 8 | 9 | 10 | Absolutely true |
|-------------------|---|---|---|---|---|---|---|---|---|---|----|-----------------|

12 – You felt you wanted to withdraw and be alone over several consecutive days, because of your rheumatic disorder

|                   |   |   |   |   |   |   |   |   |   |   |    |                 |
|-------------------|---|---|---|---|---|---|---|---|---|---|----|-----------------|
| Completely untrue | 0 | 1 | 2 | 3 | 4 | 5 | 6 | 7 | 8 | 9 | 10 | Absolutely true |
|-------------------|---|---|---|---|---|---|---|---|---|---|----|-----------------|

13 – You felt an increased need for help over several consecutive days, because of your rheumatic disorder

|                   |   |   |   |   |   |   |   |   |   |   |    |                 |
|-------------------|---|---|---|---|---|---|---|---|---|---|----|-----------------|
| Completely untrue | 0 | 1 | 2 | 3 | 4 | 5 | 6 | 7 | 8 | 9 | 10 | Absolutely true |
|-------------------|---|---|---|---|---|---|---|---|---|---|----|-----------------|

# STPR - Strategies in the Treatment of Patients with RA

---

## Anchor question

In the last three months (or at some time since the last consultation),

|   |                                   |                                                                                                                  |
|---|-----------------------------------|------------------------------------------------------------------------------------------------------------------|
| 1 | Do you think your RA has a flare? | <input type="checkbox"/> No<br><input type="checkbox"/> Yes, once<br><input type="checkbox"/> Yes, several times |
|---|-----------------------------------|------------------------------------------------------------------------------------------------------------------|
